# Supplementary material for: A novel bright cyan emitting phosphor of Eu2+activated Ba6BO3Cl9with robust thermal stability for full-spectrum WLED applications
Source: Royal Society of Chemistry journal article supplement (doi:10.1039/d3qi00015j), 2023-01-01
Supplement: d3qi00015j1.pdf [file d3qi00015j1.pdf]

## Supporting Information

### **A novel bright cyan emitting phosphor of Eu<sup>2+</sup> activated Ba<sub>6</sub>BO<sub>3</sub>Cl<sub>9</sub> with robust thermal stability for full-spectrum WLED applications**

Shengjian Jiao,<sup>a,b</sup> Ran Pang,<sup>a,\*</sup> Jiutian Wang,<sup>a,b</sup> Tao Tan,<sup>a,b</sup> Chengyu Li,<sup>a,b,\*</sup> and

Hongjie Zhang<sup>a,c</sup>

<sup>a</sup> *State key Laboratory of Rare Earth Resource Utilization, Changchun Institute of Applied Chemistry, Chinese Academy of Sciences, Changchun 130022, China*

<sup>b</sup> *University of Science and Technology of China, Hefei 230026, China*

<sup>c</sup> *The GBA National Institute for Nanotechnology Innovation, Guangzhou 510535,*

*China*

*\* Corresponding author: Tel: +86-0431-85262258*

*E-mail address: cyli@ciac.ac.cn and pangran@ciac.ac.cn*

**Table S1** Rietveld fitting results of BBC and BBC: 0.05Eu<sup>2+</sup>

| formula                         | BBC                     | BBC: 0.05Eu <sup>2+</sup> |
|---------------------------------|-------------------------|---------------------------|
| crystal system                  | monoclinic              | monoclinic                |
| space group                     | <i>P2<sub>1</sub>/c</i> | <i>P2<sub>1</sub>/c</i>   |
| <i>a</i> (Å)                    | 8.2466(2)               | 8.2442(7)                 |
| <i>b</i> (Å)                    | 12.2685(2)              | 12.2676(1)                |
| <i>c</i> (Å)                    | 19.1109(3)              | 19.1157(2)                |
| $\alpha = \beta = \gamma$ (deg) | 90                      | 90                        |
| <i>Z</i>                        | 4                       | 4                         |
| <i>V</i> (Å <sup>3</sup> )      | 1933.51(7)              | 1933.3(5)                 |
| <i>R<sub>p</sub></i>            | 0.0292                  | 0.0619                    |
| <i>R<sub>wp</sub></i>           | 0.0376                  | 0.0941                    |
| $\chi^2$                        | 1.875                   | 2.543                     |

**Table S2** Atomic positions of Ba<sub>6</sub>BO<sub>3</sub>Cl<sub>9</sub>

| atom | site | x        | y        | z       | occupancy | U <sub>iso</sub> |
|------|------|----------|----------|---------|-----------|------------------|
| Ba1  | 4e   | -0.05149 | 0.17482  | 0.50470 | 1.000     | 0.01496          |
| Ba2  | 4e   | -0.06280 | 0.17843  | 0.24430 | 1.000     | 0.01857          |
| Ba3  | 4e   | 0.42654  | 0.33286  | 0.50219 | 1.000     | 0.01619          |
| Ba4  | 4e   | 0.42583  | 0.32508  | 0.25090 | 1.000     | 0.02474          |
| Ba5  | 4e   | 0.45877  | 0.04872  | 0.37226 | 1.000     | 0.01588          |
| Ba6  | 4e   | -0.05581 | 0.46467  | 0.37458 | 1.000     | 0.01190          |
| B    | 4e   | 0.16239  | 0.28865  | 0.34253 | 1.000     | -0.05952         |
| O1   | 4e   | 0.12304  | 0.29624  | 0.42315 | 1.000     | -0.06064         |
| O2   | 4e   | 0.13589  | 0.2923   | 0.26258 | 1.000     | 0.01568          |
| O3   | 4e   | 0.33079  | 0.25664  | 0.36404 | 1.000     | -0.04351         |
| Cl1  | 4e   | -0.07419 | 0.00138  | 0.62518 | 1.000     | -0.00313         |
| Cl2  | 4e   | -0.20837 | 0.45066  | 0.52714 | 1.000     | 0.00228          |
| Cl3  | 4e   | -0.1395  | 0.71509  | 0.37508 | 1.000     | -0.00751         |
| Cl4  | 4e   | -0.17233 | 0.44221  | 0.23637 | 1.000     | -0.00996         |
| Cl5  | 4e   | -0.0436  | -0.01923 | 0.13443 | 1.000     | -0.00844         |
| Cl6  | 4e   | 0.27648  | 0.08211  | 0.22565 | 1.000     | -0.01231         |
| Cl7  | 4e   | 0.72565  | 0.23162  | 0.36609 | 1.000     | -0.00607         |
| Cl8  | 4e   | 0.71647  | -0.06505 | 0.4826  | 1.000     | -0.01644         |
| Cl9  | 4e   | 0.36492  | -0.18846 | 0.38465 | 1.000     | 0.01505          |

**Table S3** Atomic positions of Ba<sub>6</sub>BO<sub>3</sub>Cl<sub>9</sub>: 0.05Eu<sup>2+</sup>

| atom | site | x        | y        | z       | occupancy | U <sub>iso</sub> |
|------|------|----------|----------|---------|-----------|------------------|
| Ba1  | 4e   | -0.05246 | 0.17373  | 0.50652 | 0.9844    | 0.01291          |
| Ba2  | 4e   | -0.06265 | 0.17968  | 0.24271 | 0.9829    | 0.02173          |
| Ba3  | 4e   | 0.42634  | 0.33187  | 0.50248 | 0.9505    | 0.01428          |
| Ba4  | 4e   | 0.42763  | 0.32501  | 0.24925 | 0.9475    | 0.03047          |
| Ba5  | 4e   | 0.45823  | 0.04871  | 0.37113 | 0.934     | 0.01469          |
| Ba6  | 4e   | -0.05395 | 0.46527  | 0.37396 | 0.9007    | 0.00921          |
| Eu1  | 4e   | -0.05246 | 0.17373  | 0.50652 | 0.0156    | 0.02295          |
| Eu2  | 4e   | -0.06265 | 0.17968  | 0.24271 | 0.0171    | 0.02816          |
| Eu3  | 4e   | 0.42634  | 0.33187  | 0.50248 | 0.0495    | 0.02308          |
| Eu4  | 4e   | 0.42763  | 0.32501  | 0.24925 | 0.0525    | 0.03073          |
| Eu5  | 4e   | 0.45823  | 0.04871  | 0.37113 | 0.066     | 0.02381          |
| Eu6  | 4e   | -0.05395 | 0.46527  | 0.37396 | 0.0993    | 0.02231          |
| B    | 4e   | 0.14513  | 0.28157  | 0.35263 | 1.000     | -0.02022         |
| O1   | 4e   | 0.11471  | 0.30256  | 0.42414 | 1.000     | -0.03851         |
| O2   | 4e   | 0.15588  | 0.29597  | 0.22045 | 1.000     | 0.14075          |
| O3   | 4e   | 0.34029  | 0.25868  | 0.37112 | 1.000     | -0.05713         |
| Cl1  | 4e   | -0.07477 | -0.00008 | 0.61792 | 1.000     | 0.00273          |
| Cl2  | 4e   | -0.21793 | 0.45238  | 0.52767 | 1.000     | 0.01774          |
| Cl3  | 4e   | -0.13811 | 0.7196   | 0.37924 | 1.000     | -0.02578         |
| Cl4  | 4e   | -0.17952 | 0.44792  | 0.23369 | 1.000     | -0.00902         |
| Cl5  | 4e   | -0.04115 | -0.01931 | 0.13526 | 1.000     | 0.00626          |
| Cl6  | 4e   | 0.27585  | 0.08028  | 0.22688 | 1.000     | -0.00782         |
| Cl7  | 4e   | 0.72385  | 0.23778  | 0.37216 | 1.000     | -0.00996         |
| Cl8  | 4e   | 0.71205  | -0.06391 | 0.48177 | 1.000     | -0.01664         |
| Cl9  | 4e   | 0.36667  | -0.18984 | 0.37874 | 1.000     | 0.03524          |

**Table S4** Bond details of Ba-O and Ba-Cl in the BBC and BBC: 0.05Eu<sup>2+</sup>

| Bond                  | BBC    | BBC: 0.05Eu <sup>2+</sup> |
|-----------------------|--------|---------------------------|
| Ba1-Cl1 <sub>I</sub>  | 3.1409 | 3.0190                    |
| Ba1-Cl1 <sub>II</sub> | 3.4519 | 3.3609                    |
| Ba1-Cl2               | 3.6485 | 3.7027                    |
| Ba1-Cl3               | 3.0940 | 2.9918                    |
| Ba1-Cl7               | 3.2965 | 3.2583                    |
| Ba1-Cl8 <sub>I</sub>  | 3.5353 | 3.5344                    |
| Ba1-Cl8 <sub>II</sub> | 3.0827 | 3.1211                    |
| Ba1-Cl9               | 3.3460 | 3.3998                    |
| Ba1-O1                | 2.5935 | 2.6223                    |
| Ba2-Cl1               | 3.5151 | 3.6382                    |
| Ba2-Cl3               | 3.3791 | 3.4296                    |
| Ba2-Cl4 <sub>I</sub>  | 3.3633 | 3.4332                    |
| Ba2-Cl4 <sub>II</sub> | 3.6480 | 3.5784                    |
| Ba2-Cl5               | 3.2117 | 3.1952                    |
| Ba2-Cl6               | 3.0585 | 3.0604                    |
| Ba2-Cl7               | 2.9829 | 3.1190                    |
| Ba2-Cl9               | 3.3785 | 3.2499                    |
| Ba2-O2                | 2.1810 | 2.3371                    |
| Ba3-Cl2 <sub>I</sub>  | 3.3729 | 3.3195                    |
| Ba3-Cl2 <sub>II</sub> | 3.2561 | 3.2078                    |
| Ba3-Cl3               | 3.3863 | 3.3400                    |
| Ba3-Cl5 <sub>I</sub>  | 3.3239 | 3.3408                    |
| Ba3-Cl5 <sub>II</sub> | 3.4167 | 3.4353                    |
| Ba3-Cl8               | 3.5032 | 3.4925                    |
| Ba3-Cl9               | 3.2807 | 3.3321                    |
| Ba3-O1                | 2.9558 | 2.9956                    |
| Ba3-O3                | 2.9089 | 2.7597                    |
| Ba4-Cl1               | 3.2103 | 3.3039                    |
| Ba4-Cl3               | 3.2763 | 3.2733                    |
| Ba4-Cl4               | 3.6230 | 3.5848                    |
| Ba4-Cl5               | 3.0640 | 3.0656                    |
| Ba4-Cl6 <sub>I</sub>  | 3.2609 | 3.2806                    |
| Ba4-Cl6 <sub>II</sub> | 3.5959 | 3.5817                    |
| Ba4-Cl9               | 3.5312 | 3.4508                    |
| Ba4-O2                | 2.4352 | 2.3344                    |
| Ba4-O3                | 2.4494 | 2.5705                    |
| Ba5-Cl1               | 3.2309 | 3.2239                    |
| Ba5-Cl4               | 3.0216 | 2.9784                    |

|                       |        |        |
|-----------------------|--------|--------|
| Ba5-C16               | 3.2040 | 3.1646 |
| Ba5-C17               | 3.1455 | 3.1899 |
| Ba5-C18 <sub>I</sub>  | 3.3012 | 3.2806 |
| Ba5-C18 <sub>II</sub> | 3.1358 | 3.1482 |
| Ba5-C19               | 3.0204 | 3.0257 |
| Ba5-O3                | 2.7649 | 2.7532 |
| Ba6-C12 <sub>I</sub>  | 3.1818 | 3.2380 |
| Ba6-C12 <sub>II</sub> | 3.0564 | 3.0954 |
| Ba6-C13               | 3.1488 | 3.1978 |
| Ba6-C14               | 2.8228 | 2.8822 |
| Ba6-C15               | 3.3136 | 3.3481 |
| Ba6-C16               | 3.3263 | 3.3108 |
| Ba6-C17               | 3.3835 | 3.3385 |
| Ba6-O1                | 2.7025 | 2.6151 |
| Ba6-O2                | 3.4004 | 3.3054 |

---

**Table S5** Average lifetime ( $\tau$ ) of  $\text{Eu}^{2+}$  470 nm emission  
in BBC:  $x\text{Eu}^{2+}$  phosphors (under 375 nm excitation)

| Eu(x) | $A_1$    | $\tau_1$ | $A_2$    | $\tau_2$ | $\tau_{\text{ave}}$ (ns) |
|-------|----------|----------|----------|----------|--------------------------|
| 0.01  | 1876.968 | 394.1397 | 5291.57  | 699.5588 | 648.688                  |
| 0.02  | 1496.992 | 293.6175 | 5898.081 | 682.9566 | 644.6523                 |
| 0.03  | 1227.002 | 267.8218 | 6287.244 | 672.9735 | 643.4022                 |
| 0.04  | 1360.158 | 252.7384 | 6171.785 | 672.9735 | 640.851                  |
| 0.05  | 1293.494 | 184.6729 | 6401.28  | 662.0272 | 636.5559                 |
| 0.06  | 1533.895 | 226.095  | 6155.831 | 663.3228 | 629.0949                 |
| 0.07  | 1749.579 | 172.4845 | 6343.757 | 659.4066 | 627.643                  |
| 0.08  | 1763.353 | 215.9969 | 6227.862 | 663.9352 | 626.1543                 |
| 0.09  | 1510.143 | 190.1002 | 6188.861 | 656.7849 | 625.999                  |
| 0.10  | 1543.166 | 195.2316 | 6059.367 | 653.167  | 620.7738                 |

**Table S6.** The detail information of Gaussian sub-bands of  $\text{Ba}_6\text{BO}_3\text{Cl}_9: 0.05\text{Eu}^{2+}$  sample measured at liquid helium temperature.

| Wavelength (nm) | Wavenumber ( $\text{cm}^{-1}$ ) | Area proportion (%) | FWHM (nm) |
|-----------------|---------------------------------|---------------------|-----------|
| 457             | 21,882                          | 10.88               | 23.76     |
| 470             | 21,276                          | 34.09               | 39.40     |
| 496             | 20,161                          | 33.07               | 61.02     |
| 522             | 19,157                          | 21.95               | 106.13    |

**Table S7.** Total energy and defect formation energy of BBC:  $\text{Eu}_{\text{Ba}}$ .

| Compositions                  | E(doped) (eV) | E(undoped) (eV) | $E_f$ (eV) |
|-------------------------------|---------------|-----------------|------------|
| BBC: $\text{Eu}_{\text{Ba}1}$ | -397.750      | -397.622        | 7.932      |
| BBC: $\text{Eu}_{\text{Ba}3}$ | -397.926      | -397.622        | 7.756      |
| BBC: $\text{Eu}_{\text{Ba}5}$ | -397.992      | -397.622        | 7.690      |
| BBC: $\text{Eu}_{\text{Ba}6}$ | -398.000      | -397.622        | 7.682      |

**Table S8.** The CIE coordinates of BBC:  $0.05\text{Eu}^{2+}$  phosphors under the excitation of 355 nm at different temperature (298 K - 573 K).

| Temperature ( $^{\circ}\text{C}$ ) | CIE coordinates  | Peak (nm) |
|------------------------------------|------------------|-----------|
| 25                                 | (0.1673, 0.2393) | 470       |
| 50                                 | (0.1693, 0.2384) | 469       |
| 75                                 | (0.1712, 0.2376) | 468       |
| 100                                | (0.1733, 0.2380) | 468       |
| 125                                | (0.1751, 0.2383) | 468       |
| 150                                | (0.1771, 0.2397) | 468       |
| 175                                | (0.1789, 0.2404) | 464       |
| 200                                | (0.1806, 0.2411) | 468       |
| 225                                | (0.1824, 0.2410) | 468       |
| 250                                | (0.1836, 0.2407) | 466       |
| 275                                | (0.1851, 0.2410) | 468       |
| 300                                | (0.1868, 0.2412) | 467       |



**Table S9.** Comparison of luminescence properties of BBC:0.05Eu<sup>2+</sup> and some reported blue and cyan phosphors.

| Phosphor                                                                                     | Peak position (nm) | FWHM (nm) | IQE (%) | EQE (%) | I <sub>150</sub> <sup>°C</sup> (%) | Ref.      |
|----------------------------------------------------------------------------------------------|--------------------|-----------|---------|---------|------------------------------------|-----------|
| Na <sub>0.2</sub> Al <sub>2</sub> B <sub>2</sub> O <sub>7</sub> : 1.8Eu                      | 470                | ~70       | 60.2    | 24.9    | 83                                 | 1         |
| Na <sub>0.5</sub> K <sub>0.5</sub> Li <sub>3</sub> SiO <sub>4</sub> : Eu <sup>2+</sup>       | 486                | 20.7      | 76      | 30      | 93                                 | 2         |
| BaAl <sub>12</sub> O <sub>19</sub> : Eu <sup>2+</sup>                                        | 445                | 52        | 89.6    | /       | 91.1                               | 3         |
| Ba <sub>0.98</sub> ScO <sub>2</sub> F: 0.02Eu <sup>2+</sup>                                  | 487                | 103       | ~80     | /       | ~30                                | 4         |
| ScCaO(BO <sub>3</sub> ): Ce <sup>3+</sup>                                                    | 473                | 97        | 66.5    | 38.5    | 21.5                               | 5         |
| BaScO <sub>2</sub> F: Bi <sup>3+</sup> , K <sup>+</sup>                                      | 506                | ~50       | 57.3    |         | 87                                 | 6         |
| Ca <sub>3</sub> Ga <sub>4</sub> O <sub>9</sub> : 0.02Bi <sup>3+</sup> , 0.07Zn <sup>2+</sup> | 486                | 99        | 51.5    | 39.2    | 76                                 | 7         |
| Ca <sub>2</sub> LuZr <sub>2</sub> (AlO <sub>4</sub> ) <sub>3</sub> : Ce <sup>3+</sup>        | 483                | 84        | 58      | /       | 67                                 | 8         |
| SrLaGaO <sub>4</sub> : Bi <sup>3+</sup>                                                      | 475                | 107       | /       | /       | ~15                                | 9         |
| Ca <sub>2</sub> GdHf <sub>2</sub> (AlO <sub>4</sub> ) <sub>3</sub> : Ce <sup>3+</sup>        | 489                | 103       | 80      | 49      | /                                  | 10        |
| NaMgBO <sub>3</sub> : Ce <sup>3+</sup>                                                       | 480                | 102       | /       | /       | ~80                                | 11        |
| Ba <sub>2</sub> CaB <sub>2</sub> Si <sub>4</sub> O <sub>14</sub> : Ce <sup>3+</sup>          | 478                | 142       | 54      | /       | 95                                 | 12        |
| Ba <sub>6</sub> BO <sub>3</sub> Cl <sub>9</sub> :Eu <sup>2+</sup>                            | 470                | 59.84     | 86.2    | 41.3    | 93.9                               | This work |

**Table S10.** Full set of 15 CRIs and the average CRI (Ra) values of the as-prepared WLEDs.

| CRIs             | R1 | R2 | R3 | R4 | R5 | R6 | R7 | R8 | R9   | R10 | R11 | R12 | R13 | R14 | R15 | Ra   |
|------------------|----|----|----|----|----|----|----|----|------|-----|-----|-----|-----|-----|-----|------|
| LED <sub>1</sub> | 71 | 72 | 85 | 81 | 69 | 63 | 89 | 87 | 50   | 48  | 75  | 39  | 68  | 94  | 64  | 77.1 |
| LED <sub>2</sub> | 96 | 98 | 98 | 96 | 97 | 97 | 92 | 84 | 59   | 96  | 97  | 96  | 96  | 99  | 92  | 94.8 |
| LED <sub>3</sub> | 81 | 85 | 93 | 81 | 80 | 84 | 91 | 70 | 14   | 69  | 80  | 66  | 81  | 97  | 70  | 83   |
| LED <sub>4</sub> | 81 | 88 | 96 | 82 | 82 | 82 | 97 | 89 | 70   | 75  | 75  | 78  | 81  | 97  | 83  | 87.2 |
| LED <sub>5</sub> | 97 | 97 | 96 | 94 | 97 | 95 | 99 | 96 | 84   | 95  | 90  | 94  | 98  | 97  | 96  | 96.4 |
| LED <sub>6</sub> | 95 | 91 | 88 | 81 | 92 | 91 | 82 | 81 | 63   | 84  | 86  | 79  | 91  | 94  | 84  | 87.7 |
| LED <sub>7</sub> | 25 | 58 | 30 | 8  | 43 | 53 | 50 | 21 | -194 | 23  | -5  | 53  | 28  | 57  | 22  | 35.9 |

## Figures and Figure Captions

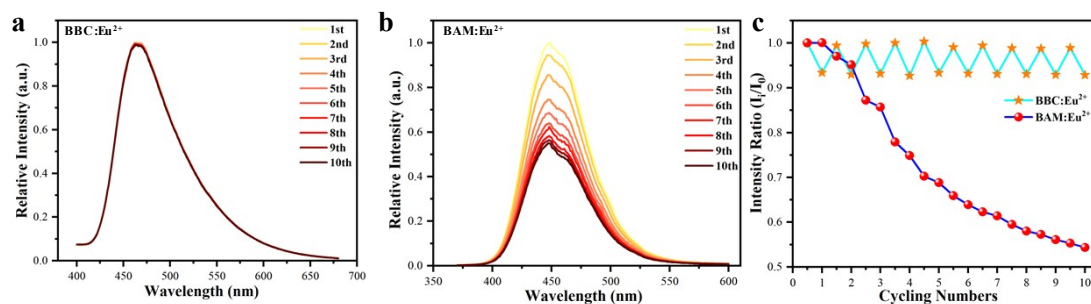

**Figure S1** (a) Normalized spectra of BBC: Eu<sup>2+</sup> measured at 150 °C upon 355 nm excitation for consecutive ten thermocycling. (b) Normalized spectra of BAM: Eu<sup>2+</sup> measured at 150 °C upon 365 nm excitation for consecutive ten thermocycling. (c) Reversible temperature-sensing performance of BBC: Eu<sup>2+</sup> and BAM: Eu<sup>2+</sup> based on the integral intensity in heating-cooling cycles.

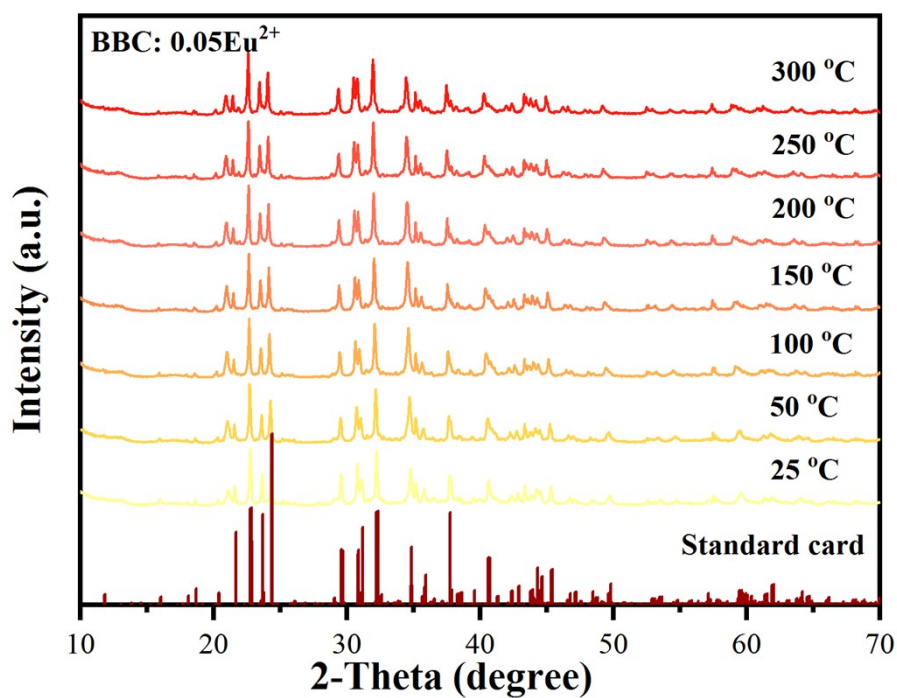

**Figure S2** Temperature dependent XRD patterns of BBC: 0.05Eu<sup>2+</sup> samples in  $2\theta$  range of 10 — 70°.

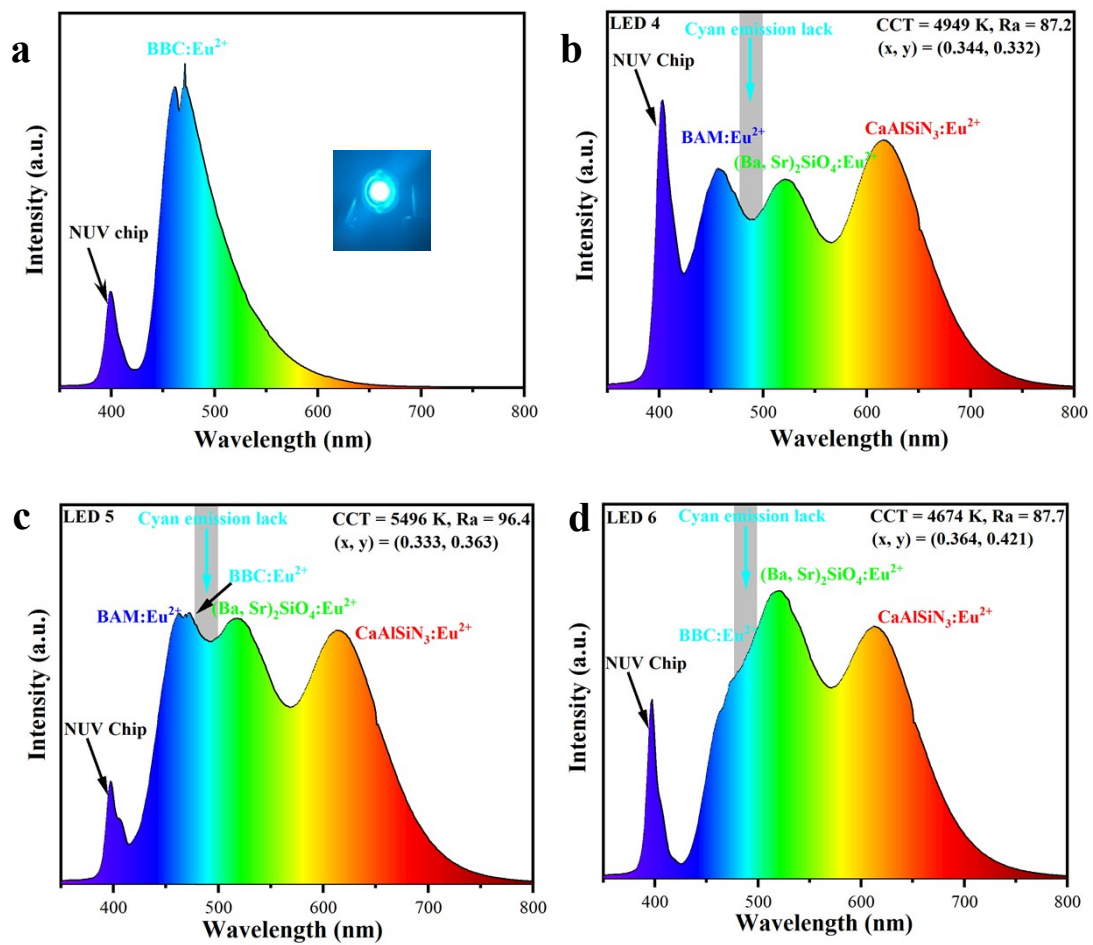

**Figure S3** The PL spectrum of fabricated full spectrum w-LEDs based on the strategies of RGB phosphors combined with 395 nm-emitting InGaN chip.

## Supplementary Notes

### Supplementary Note 1:

The Kubelka–Munk function is used herein,<sup>3, 13, 14</sup> which can be expressed as:

$$[F(R_{\infty})hv]^n = C(hv - E_g) \quad (1)$$

where  $hv$  is the photon energy,  $A$  is the absorption constant,  $E_g$  is the value of the band gap,  $n$  represents the transition coefficient ( $n = 2$  for the direct band gap,  $n = 1/2$  for the indirect band gap),  $F(R_{\infty})$  is the Kubelka–Munk function, which is calculated by the following equation:<sup>3, 15</sup>

$$[F(R_{\infty})] = (1 - R)^2 / 2R \quad (2)$$

In the above equation,  $R$  is the reflectance parameter in the DRS.

## Supplementary Note 2:

To investigate the mechanism of concentration quenching for Eu<sup>2+</sup>-doped BBC, the critical distance  $R_c$  for qualitatively judging non-radiative energy transfer between the Eu<sup>2+</sup> ions in the host lattice can be calculated using the formula proposed by Blass Grabmaier, as follows:<sup>14, 16, 17</sup>

$$R_c \approx 2 \left[ \frac{3V}{4\pi X_C Z} \right]^{1/3} \quad (3)$$

where  $V$  represents the volume of host lattice,  $X_C$  is the critical value of the concentration, and  $Z$  denotes the number of sites in the unit cell that can be doped. For the BBC crystal structure,  $V = 638.23(31) \text{ \AA}^3$ ,  $X_C = 0.05$ , and  $Z = 4$ , so the critical distance  $R_c$  of Eu<sup>2+</sup> ions was calculated to be approximately 18.27 Å. As is known to all, the exchange interaction is a short-range effect that occurs only when the distance between activators is less than 5 Å. Therefore, the exchange interaction can be excluded. Hence, we speculate that electric multipolar-multipolar interaction plays a major role in the concentration quenching for BBC: Eu<sup>2+</sup>. According to the report of Van Uiter and Dexter, the emission intensity per activators can be expressed by the following equation:<sup>17, 18</sup>

$$\frac{I}{x} = \frac{k}{1 + \beta(x)^{\theta/3}} \quad (4)$$

where  $I$  represents the luminescence intensity,  $x$  denotes the optimum concentration of the activator ions,  $k$  and  $\beta$  are constants for a given host lattice and excitation conditions, and  $\theta$  offers an indication of electric multipolar nature. When  $\theta$  is equal to 6, 8 or 10, it corresponds to dipole-dipole (d-d), dipole-quadrupole (d-q) and quadrupole-quadrupole (q-q) interactions, respectively.  $\theta = 3$  denotes energy migration between the closest or next closest Eu<sup>2+</sup> ions. As depicted in the inset of Fig. 3e, the dependence of  $\ln(I/x)$  and  $\ln(x)$  can be well-fitted as a line with the slope 2.653, and the  $\theta$  can be calculated to be approximately 7.89, which is close to 8. The finding suggests that dipole-quadrupole interaction is the major mechanism type of concentration quenching behavior for BBC: xEu<sup>2+</sup> phosphors.



### Supplementary Note 3:

The average decay time of the sample can be computed as follows:<sup>19-21</sup>

$$I = \sum_{i=1}^n A_i \exp\left(-t/\tau_i\right) \quad (5)$$

$$\tau_{ave} = \frac{\sum_{i=1}^n A_i \tau_i^2}{\sum_{i=1}^n A_i \tau_i} \quad (6)$$

where  $I$  is the luminescence intensity,  $A_i$  is constant,  $t$  is the time, and  $\tau_i$  is the decay time for the every components, respectively. Therefore, the average lifetimes of BBC:  $x\text{Eu}^{2+}$  ( $0.01 \leq x \leq 0.10$ ) were calculated to be 648.69, 643.40, 636.55, 627.64, 625.99 and 620.77 ns for  $x$  values of 0.01, 0.03, 0.05, 0.07, 0.09, 0.10, respectively. The detailed calculation results are listed in the Table S5. The fitting result is within the usual time range of the spin-allowed  $4f^65d^1 \rightarrow 4f^7$  ( $^8S_{7/2}$ ) of  $\text{Eu}^{2+}$ .

#### Supplementary Note 4:

We roughly estimate the relationship between the luminescence centers of  $\text{Eu}^{2+}$  and local structure of cationic sites according to the empirical formula established by Van Uitert:<sup>2, 14, 22</sup>

$$E = Q \left[ 1 - \left( \frac{V}{4} \right)^{\frac{1}{V}} \times 10^{-\frac{nEa r}{80}} \right] \quad (7)$$

where,  $E$  ( $\text{cm}^{-1}$ ) represents the energy position of  $\text{Eu}^{2+}$  emission peak;  $Q$  stands for the energy position for the lowest d-band edge for free ion ( $Q_{\text{Eu}^{2+}} = 34\,000\ \text{cm}^{-1}$ );  $V$  is the valence of the cation ( $V_{\text{Eu}^{2+}} = 2$ );  $n$  is the coordination number (CN) of the site occupied by activator ion;  $Ea$  refers to the electron affinity (eV) of anion atom, which is a constant in the same host; and  $r$  is the radius of the cationic ion ( $r_{\text{Ba}^{2+}} = 1.42, \text{CN} = 8$ ), ( $r_{\text{Ba}^{2+}} = 1.47, \text{CN} = 9$ ) replaced by the activator ( $\text{Eu}^{2+}$ ). It is not practical to accurately obtain the emission position ( $E$ ). However, considering that  $E$  is proportional to the product of  $n$  and  $r$ , we can qualitatively judge which crystallographic site is replaced by  $\text{Eu}^{2+}$  in BBC host.



### Supplementary Note 5:

Generally, the crystal field splitting of the  $4f^{n-1}5d$ -levels of  $Ce^{3+}$  and  $Eu^{2+}$  ( $\varepsilon_{cfs}$ ) is a good index to evaluate the site occupations of activator ions, which is closely related to coordination number, polyhedron shape and size, while being irrelevant of the anion types.<sup>23, 24</sup> According to the theory of Dorenbos, the crystal field splitting  $\varepsilon_{cfs}$  can be evaluated by the following equation:<sup>25, 26</sup>

$$\varepsilon_{cfs} = \beta_{poly}^Q R_{av}^{-2} \quad (8)$$

where  $\beta_{poly}^Q$  is a constant depends on the type of coordination polyhedron, irrespective of the lanthanide valence (trivalent,  $Q=3+$  or divalent,  $Q=2+$ ).  $R_{av}$  is defined as

$$R_{av} = \frac{1}{N} \sum_{i=1}^N (R_i - 0.6\Delta R) \quad (9)$$

where  $R_i$  are the individual bond length to the  $N$  coordinating anions in the unrelaxed lattice.  $\Delta R \equiv R_M - R_{Ln}$ , where  $R_M$  is the ionic radius of the cation which is replaced by the lanthanide  $Ln$  with ionic radius  $R_{Ln}$ .  $0.6\Delta R$  is an estimation of the bond length relaxation. When the polyhedron occupied by  $Eu^{2+}$  ions have the same shape, the  $\beta_{poly}^Q$  has no influence on  $\varepsilon_{cfs}$ . In this case, the crystal field splitting  $\varepsilon_{cfs}$  is closely related to the bond length. It can be seen that the short bond length means bigger degree of crystal field splitting and a longer emission wavelength. However, when the polyhedron occupied by  $Eu^{2+}$  ions have different shape, it is necessary to compare the influence between  $\beta_{poly}^Q$  and  $R_{av}^{-2}$ . In general, polyhedron with higher coordination number tends to reduce the crystal field splitting. When the coordination numbers are same but the shape are different, the  $\varepsilon_{cfs}$  of polyhedrons is mainly depend on  $R_{av}^{-2}$ .

### Supplementary Note 6:

To better comprehend thermal quenching, a modified Arrhenius equation can be used to represent the relationship between the temperature and the emission intensity.<sup>27-</sup>

29

$$I(T) = \frac{I_0}{1 + A \cdot \exp\left(-\frac{\Delta E}{k_B \cdot T}\right)} \quad (10)$$

where  $I_0$  represents the initial emission intensity (298 K),  $I(T)$  denotes the luminescence intensity at a specified temperature  $T$ ,  $A$  is the constant, and  $k_B$  is Boltzmann constant ( $8.617 \times 10^{-5}$  eV/K). As is shown in Fig. 6c, we can obtain the relationship of  $\ln(I_0/I_T - 1)$  with  $1/k_B T$  is linear with the slope value of  $-E_a$ . From the fitting result of Fig. 6c, it is confirmed that  $\Delta E$  is equal to 0.3612 eV for the BBC: 0.05Eu<sup>2+</sup> phosphor.

### Supplementary Note 7:

The chromaticity shift ( $\Delta E_s$ ) can efficiently evaluate the chromaticity stability of phosphor, which can be calculated by the following equation:<sup>5, 30, 31</sup>

$$\Delta E_s = \sqrt{(u'_t - u'_{298K})^2 + (v'_t - v'_{298K})^2 + (w'_t - w'_{298K})^2} \quad (11)$$

where  $u' = 4x/(3-2x+12y)$ ,  $v' = 9y/(3-2x+12y)$  and  $w' = 1-u'-v'$ . The  $x$  and  $y$  are chromaticity coordinates in CIE 1931 color space, and  $t$  is the given temperature.  $\Delta E_s$  of the representative BBC: 0.05Eu<sup>2+</sup> phosphor at 150 °C was determined as  $1.18 \times 10^{-2}$ , which was smaller than commercial BaMgAl<sub>10</sub>O<sub>17</sub>:Eu<sup>2+</sup> blue phosphor ( $\Delta E_s = 1.52 \times 10^{-2}$ ),<sup>32</sup> commercial CaAlSiN<sub>3</sub>:Eu<sup>2+</sup> red phosphor ( $\Delta E_s = 4.4 \times 10^{-2}$ ),<sup>33</sup> and some phosphor reported recently such as Ca<sub>2</sub>LuHf<sub>2</sub>Al<sub>3</sub>O<sub>12</sub>:Ce<sup>3+</sup> cyan phosphor ( $\Delta E_s = 1.7 \times 10^{-2}$ ),<sup>34</sup> CaGd<sub>2</sub>HfSc(AlO<sub>4</sub>)<sub>3</sub>:Ce<sup>3+</sup> yellow phosphor ( $\Delta E_s = 2.1 \times 10^{-2}$ ),<sup>35</sup> CsMoO<sub>2</sub>F<sub>3</sub>:Mn<sup>4+</sup> red phosphor ( $\Delta E_s = 3.39 \times 10^{-2}$ ),<sup>36</sup> etc.

### Supplementary Note 8:

The Debye temperature has recently been proven to be a proxy of structural rigidity, which can be calculated based on the following equation: <sup>6, 31, 37</sup>

$$\Theta_D = \sqrt{\frac{3h^2TN_A}{Ak_BU_{iso}}} \quad (12)$$

where  $\Theta_D$  is negative relation with average atomic displacement parameter ( $U_{iso}$ ). The Debye temperature of BBC was calculated by the DFT-PBE method, the calculation result is 517 K. The calculated  $\Theta_D$  value for  $\text{Sr}_3(\text{PO}_4)_2: \text{Eu}^{2+}$  is 559 K, the recently reported superb thermal stability phosphor with emission loss of only 4%/8% at 150/300 °C.<sup>38</sup> The  $\Theta_D$  value for  $\text{SrGa}_2\text{B}_2\text{O}_7: \text{Bi}^{3+}$  with negative thermal quenching is 602 K, which keeps 124.8% emission intensity of initial intensity at 150 °C.<sup>39</sup> In addition, the calculated  $\Theta_D$  of  $(\text{Ba}_{1-x}\text{Sr}_x)_{0.98}\text{Eu}_{0.02}\text{ScO}_2\text{F}$  phosphor host with excellent thermal stability is 497 K.<sup>4</sup>

## Supplementary Note 9:

The internal quantum efficiencies (IQE) can be calculated based on the following equation:<sup>21, 40</sup>

$$\eta_{IQE} = \frac{\int L_S}{\int E_R - \int E_S} \quad (13)$$

where LS represents PL spectrum of the sample. ES is the excitation spectrum used to excite samples. ER is the spectrum of the excitation light without sample in the integrating sphere.

## Reference

1. X. Zhang, J. Zhang, X. Wu, L. Yu, Y. Liu, X. Xu and S. Lian, Discovery of blue-emitting Eu<sup>2+</sup>-activated sodium aluminate phosphor with high thermal stability via phase segregation, *Chem. Eng. J.*, 2020, **388**, 124289.
2. M. Zhao, H. Liao, M. S. Molokeev, Y. Zhou, Q. Zhang, Q. Liu and Z. Xia, Emerging ultra-narrow-band cyan-emitting phosphor for white LEDs with enhanced color rendition, *Light Sci Appl*, 2019, **8**, 38.
3. Y. Wei, L. Cao, L. Lv, G. Li, J. Hao, J. Gao, C. Su, C. C. Lin, H. S. Jang, P. Dang and J. Lin, Highly Efficient Blue Emission and Superior Thermal Stability of BaAl<sub>12</sub>O<sub>19</sub>:Eu<sup>2+</sup> Phosphors Based on Highly Symmetric Crystal Structure, *Chem. Mater.*, 2018, **30**, 2389-2399.
4. S. Hariyani, M. Amachraa, M. Khan, S. P. Ong and J. Brgoch, Local environment rigidity and the evolution of optical properties in the green-emitting phosphor Ba<sub>1-x</sub>Sr<sub>x</sub>ScO<sub>2</sub>F:Eu<sup>2+</sup>, *J. Mater. Chem. C*, 2022, **10**, 2955-2964.
5. W. Wang, T. Tan, S. Wang, S. Zhang, R. Pang, D. Li, L. Jiang, H. Li, C. Li and H. Zhang, Low-concentration Ce<sup>3+</sup>-activated ScCaO(BO<sub>3</sub>) blue-cyan phosphor with high efficiency toward full-spectrum white LED applications, *Mater. Today Chem.*, 2022, **26**, 101030.
6. M. Cai, T. Lang, T. Han, D. Valiev, S. Fang, C. Guo, S. He, L. Peng, S. Cao, B. Liu, L. Du, Y. Zhong and E. Polissadova, Novel Cyan-Green-Emitting Bi<sup>3+</sup>-Doped BaScO<sub>2</sub>F, R<sup>+</sup> (R = Na, K, Rb) Perovskite Used for Achieving Full-Visible-Spectrum LED Lighting, *Inorg Chem*, 2021, **60**, 15519-15528.
7. D. Liu, X. Yun, G. Li, P. Dang, M. S. Molokeev, H. Lian, M. Shang and J. Lin, Enhanced Cyan Emission and Optical Tuning of Ca<sub>3</sub>Ga<sub>4</sub>O<sub>9</sub>:Bi<sup>3+</sup> for High-Quality Full-Spectrum White Light-Emitting Diodes, *Adv. Opt. Mater.*, 2020, **8**, 2001037.
8. L. Sun, B. Devakumar, J. Liang, S. Wang, Q. Sun and X. Huang, A broadband cyan-emitting Ca<sub>2</sub>LuZr<sub>2</sub>(AlO<sub>4</sub>)<sub>3</sub>:Ce<sup>3+</sup> garnet phosphor for near-ultraviolet-pumped warm-white light-emitting diodes with an improved color rendering index, *J. Mater. Chem. C*, 2020, **8**, 1095-1103.
9. S. Wu, Y. Fu, Q. Liu, P. Xiong, D. Wang, G. Zhang, S. Yuan and Y. Chen, Obtain full visible spectrum light-emitting diode illumination via bismuth-activated cyan phosphors, *Mater. Today Chem.*,

2022, **23**, 100754.

10. Q. Sun, S. Wang, L. Sun, J. Liang, B. Devakumar and X. Huang, Achieving full-visible-spectrum LED lighting via employing an efficient Ce<sup>3+</sup>-activated cyan phosphor, *Mater. Today Energy*, 2020, **17**, 100448.
11. J. Zhong, Y. Zhuo, S. Hariyani, W. Zhao, J. Wen and J. Brgoch, Closing the Cyan Gap Toward Full-Spectrum LED Lighting with NaMgBO<sub>3</sub>:Ce<sup>3+</sup>, *Chem. Mater.*, 2020, **32**, 882-888.
12. S. You, Y. Zhuo, Q. Chen, J. Brgoch and R.-J. Xie, Dual-site occupancy induced broadband cyan emission in Ba<sub>2</sub>CaB<sub>2</sub>Si<sub>4</sub>O<sub>14</sub>:Ce<sup>3+</sup>, *J. Mater. Chem. C*, 2020, **8**, 15626-15633.
13. H. Liu, W. Zhang, H. Liang, Q. Zeng, J. Shi and D. Wen, Discovery of a new phosphor via aliovalent cation substitution: DFT predictions, phase transition and luminescence properties for lighting and anti-counterfeiting applications, *J. Mater. Chem. C*, 2021, **9**, 1622-1631.
14. R. Zhang and J.-F. Sun, An efficient perovskite-type Rb<sub>2</sub>CaPO<sub>4</sub>F:Eu<sup>2+</sup> phosphor with high brightness towards closing the cyan gap, *J. Alloys Compd.*, 2021, **872**, 159698.
15. Q. Zhang, X. Wang and Y. Wang, Design of a broadband cyan-emitting phosphor with robust thermal stability for high-power WLED application, *J. Alloys Compd.*, 2021, **886**, 161217.
16. Y. Zhuo, A. Mansouri Tehrani, A. O. Oliynyk, A. C. Duke and J. Brgoch, Identifying an efficient, thermally robust inorganic phosphor host via machine learning, *Nat Commun*, 2018, **9**, 4377.
17. X. Zhang and J.-F. Sun, Intense blue emission of perovskite-type fluoride phosphor Cs<sub>4</sub>Mg<sub>3</sub>CaF<sub>12</sub>:Eu<sup>2+</sup> as a promising pc-WLEDs material, *J. Alloys Compd.*, 2020, **835**, 155225.
18. M. Tian, P. Li, Z. Wang, Z. Li, J. Cheng, Y. Sun, C. Wang, X. Teng, Z. Yang and F. Teng, Controlling multi luminescent centers via anionic polyhedron substitution to achieve single Eu<sup>2+</sup> activated high-color-rendering white light/tunable emissions in single-phased Ca<sub>2</sub>(BO<sub>3</sub>)<sub>1-x</sub>(PO<sub>4</sub>)<sub>x</sub>Cl phosphors for ultraviolet converted LEDs, *Chem. Eng. J.*, 2017, **326**, 667-679.
19. S. Wang, Y. Wu, Y. Fan, L. Wu and J. Yu, Crystal structure and photoluminescence properties of blue-green-emitting Ca<sub>1-x</sub>Sr<sub>x</sub>Zr<sub>4</sub>(PO<sub>4</sub>)<sub>6</sub>:Eu<sup>2+</sup> (0≤x≤1) phosphors, *Mater. Res. Bull.*, 2020, **125**, 110781.
20. J. Qiao, L. Ning, M. S. Molokeev, Y. C. Chuang, Q. Liu and Z. Xia, Eu<sup>2+</sup> Site Preferences in the Mixed Cation K<sub>2</sub>BaCa(PO<sub>4</sub>)<sub>2</sub> and Thermally Stable Luminescence, *J Am Chem Soc*, 2018, **140**, 9730-9736.
21. J. Tang, J. Si, G. Li, T. Zhou, Z. Zhang and G. Cai, Excellent enhancement of thermal stability and quantum efficiency for Na<sub>2</sub>BaCa(PO<sub>4</sub>)<sub>2</sub>:Eu<sup>2+</sup> phosphor based on Sr doping into Ca, *J. Alloys Compd.*, 2022, **911**, 165092.
22. J. Xiang, J. Zheng, Z. Zhou, H. Suo, X. Zhao, X. Zhou, N. Zhang, M. S. Molokeev and C. Guo, Enhancement of red emission and site analysis in Eu<sup>2+</sup> doped new-type structure Ba<sub>3</sub>CaK(PO<sub>4</sub>)<sub>3</sub> for plant growth white LEDs, *Chem. Eng. J.*, 2019, **356**, 236-244.
23. Z. Song, Q. Liu, Effects of neighboring polyhedron competition on the 5d level of Ce<sup>3+</sup> in lanthanide garnets, *J. Phys. Chem. C* 2019, **123**, 8656-8662.
24. Z. Song, Q. Liu, Structural indicator to characterize the crystal-field splitting of Ce<sup>3+</sup> in garnets, *J. Phys. Chem. C* 2020, **124**, 870-873.
25. P Dorenbos, Crystal field splitting of lanthanide 4f(n-1)5d-levels in inorganic compounds, *J. Alloy. Compd.*, 2002, **341**, 156-159.
26. S. Wang, Z. Song, Y. Kong, Z. Xia, Q. Liu, Crystal field splitting of 4f(n-1)5d-levels of Ce<sup>3+</sup> and Eu<sup>2+</sup> in nitride compounds, *J. Lumin.*, 2018, **194**, 461-466.
27. P. Dai, Q. Wang, M. Xiang, T.-M. Chen, X. Zhang, Y.-W. Chiang, T.-S. Chan and X. Wang, Composition-driven anionic disorder-order transformations triggered single-Eu<sup>2+</sup>-converted high-color-

- rendering white-light phosphors, *Chem. Eng. J.*, 2020, **380**, 122508.
28. S. Zhang, Y. Nakai, T. Tsuboi, Y. Huang and H. J. Seo, Luminescence and Microstructural Features of Eu-Activated LiBaPO<sub>4</sub> Phosphor, *Chem. Mater.*, 2011, **23**, 1216-1224.
29. W. Ji, S. Wang, Z. Song and Q. Liu, Luminescent thermal stability and electronic structure of narrow-band green-emitting Sr-Sialon:Eu<sup>2+</sup> phosphors for LED/LCD backlights, *J. Alloys Compd.*, 2019, **805**, 1246-1253.
30. W. Wang, M. Tao, Y. Liu, Y. Wei, G. Xing, P. Dang, J. Lin and G. Li, Photoluminescence Control of UC<sub>4</sub>C<sub>4</sub>-Type Phosphors with Superior Luminous Efficiency and High Color Purity via Controlling Site Selection of Eu<sup>2+</sup> Activators, *Chem. Mater.*, 2019, **31**, 9200-9210.
31. W. Wang, H. Yang, M. Fu, X. Zhang, M. Guan, Y. Wei, C. C. Lin and G. Li, Superior thermally-stable narrow-band green emitter from Mn<sup>2+</sup>-doped zero thermal expansion (ZTE) material, *Chem. Eng. J.*, 2021, **415**, 128979.
32. Y. Chen, F. Pan, M. Wang, X. Zhang, J. Wang, M. Wu and C. Wang, Blue-emitting phosphor Ba<sub>4</sub>OCl<sub>6</sub>:Eu<sup>2+</sup> with good thermal stability and a tiny chromaticity shift for white LEDs, *J. Mater. Chem. C*, 2016, **4**, 2367-2373.
33. J. Liang, B. Devakumar, L. Sun, S. Wang, Q. Sun and X. Huang, Full-visible-spectrum lighting enabled by an excellent cyan-emitting garnet phosphor, *J. Mater. Chem. C*, 2020, **8**, 4934-4943.
34. Z. Zhang, B. Devakumar, S. Wang, L. Sun, N. Ma, W. Li and X. Huang, Using an excellent near-UV-excited cyan-emitting phosphor for enhancing the color rendering index of warm-white LEDs by filling the cyan gap, *Mater. Today Chem.*, 2021, **20**, 100471.
35. W. Li, N. Ma, B. Devakumar and X. Huang, Blue-light-excitable broadband yellow-emitting CaGd<sub>2</sub>HfSc(AlO<sub>4</sub>)<sub>3</sub>:Ce<sup>3+</sup> garnet phosphors for white light-emitting diode devices with improved color rendering index, *Mater. Today Chem.*, 2022, **23**, 100638.
36. S. He, F. Xu, T. Han, Z. Lu, W. Wang, J. Peng, F. Du, F. Yang and X. Ye, A Mn<sup>4+</sup>-doped oxyfluoride phosphor with remarkable negative thermal quenching and high color stability for warm WLEDs, *Chem. Eng. J.*, 2020, **392**, 123657.
37. N. C. George, A. Birkel, J. Brgoch, B.-C. Hong, A. A. Mikhailovsky, K. Page, A. Llobet and R. Seshadri, Average and Local Structural Origins of the Optical Properties of the Nitride Phosphor La<sub>3-x</sub>Ce<sub>x</sub>Si<sub>6</sub>N<sub>11</sub> (0 < x ≤ 3), *Inorg. Chem.*, 2013, **52**, 13730-13741.
38. Z. Sun, B. Sun, X. Zhang, D. Wen and P. Dai, Superb thermal stability purple-blue phosphor through synergistic effect of emission compensation and nonradiative transition restriction of Eu<sup>2+</sup>, *Mater. Today Chem.*, 2022, **24**, 100877.
39. S. Yang, Y. Wu, F. Yue, R. Qi, B. Jiang, J. Wu, Y. Shen, C. Duan, Y. Shan, Q. Zhao and Y. Zhang, MGa<sub>2</sub>B<sub>2</sub>O<sub>7</sub>:Bi<sup>3+</sup>, Al<sup>3+</sup> (M = Sr, Ba) blue phosphors with a quantum yield of 99% and negative thermal quenching, *Inorg. Chem. Front.*, 2021, **8**, 4257-4266.
40. H. Yang, P. Li, X. Fu, Z. Ye, X. Huo, Y. Wang, Q. Wu, H. Suo, L. Li and Z. Wang, A novel blue emitting phosphor LaScO<sub>3</sub>:Bi<sup>3+</sup> for white LEDs: high quantum efficiency, high color purity and excellent thermal stability, *Mater. Today Chem.*, 2022, **26**, 101050.
